# Supplementary material
Source: PubMed Central journal article supplement (PMC7960225)
Supplement: 15-00132.pdf [file 15-00132.pdf]

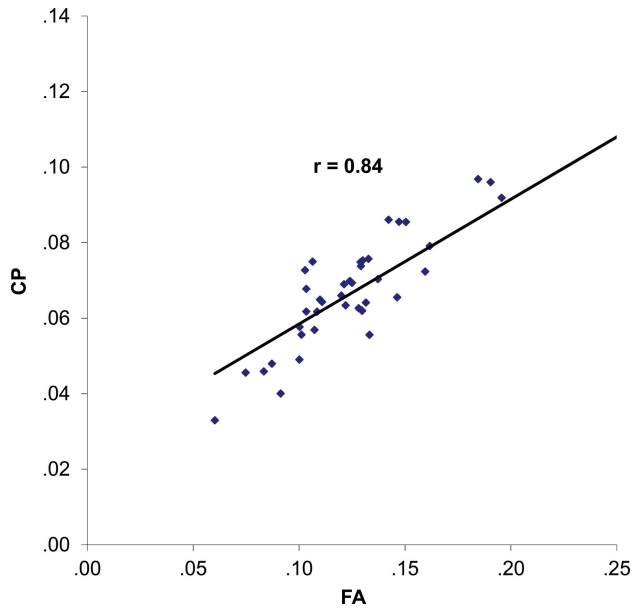

**ON-LINE FIGURE.** Scatterplot of FA and CP values from the enhancing region of glioblastomas, showing a strong positive correlation ( $r = 0.84$ ).
